# Supplementary material for: Genome-Wide Association Data Reveal a Global Map of Genetic Interactions among Protein Complexes
Source: PLoS Genet. 2009 Dec 24;5(12):e1000782. doi: 10.1371/journal.pgen.1000782 (PMC2788232; doi:10.1371/journal.pgen.1000782)
Supplement: Table S2 — List of interval-interval interactions in the natural network. A list of interval-interval interactions identified by the bi-clustering algorithm. (0.20 MB XLS) [file pgen.1000782.s007.xls]

## Sheet: Info
Table S2
List of interval-interval interactions in the natural network
Columns
A	Interval 1
B	Interval 2
C	Bi-clustering score

## Sheet: Data
626-665	824-824	5.96998359881161
0-0	14-14	4.993403543176693
26-27	1069-1073	14.660377007620538
1007-1011	1189-1190	6.216524564480528
275-278	1177-1182	7.474677913266228
9-9	23-23	4.993403543176693
1070-1070	1106-1111	7.297073465893105
47-102	815-829	66.20098552480437
3-3	30-33	8.20431702172749
1071-1072	1161-1167	5.5303495252027925
610-624	867-869	5.762657042055204
0-1	36-43	5.262712702995698
15-15	75-75	4.993403543176693
8-8	95-95	4.993403543176693
9-10	39-39	9.98701901811067
23-23	86-86	4.993403543176693
1035-1043	1181-1181	6.435156145379109
1-1	104-104	4.993403543176693
32-32	87-87	4.993403543176693
87-89	763-809	16.69272191945005
47-47	79-79	4.993403543176693
26-26	99-99	4.993403543176693
824-825	1112-1126	28.600253693797992
109-118	1021-1023	9.897341912791973
27-27	111-111	4.993403543176693
38-38	91-91	4.993403543176693
6-6	125-125	4.993403543176693
1071-1075	1193-1195	5.391747688389817
14-14	138-138	4.993403543176693
617-619	887-893	7.879384703205568
23-24	51-58	5.262712702995698
46-46	112-112	4.993403543176693
1075-1076	1182-1182	9.98701901811067
6-6	143-143	4.993403543176693
47-47	103-103	4.993403543176693
51-87	682-683	11.39949525285748
56-56	109-109	4.993403543176693
22-22	165-165	4.993403543176693
14-14	174-174	4.993403543176693
455-461	1032-1040	5.450219209550251
0-2	87-91	5.391747688389817
59-59	146-146	4.993403543176693
55-55	152-152	4.993403543176693
28-28	175-175	4.993403543176693
62-62	140-140	4.993403543176693
32-32	170-170	4.993403543176693
0-0	202-202	4.993403543176693
52-52	144-144	4.993403543176693
703-708	824-825	9.633026045741577
1023-1034	1192-1195	8.034294980678684
43-43	195-195	4.993403543176693
4-4	231-231	4.993403543176693
88-88	142-142	4.993403543176693
294-309	839-839	12.533446756319538
78-78	170-170	4.993403543176693
9-9	240-240	4.993403543176693
116-116	128-128	4.993403543176693
70-70	174-174	4.993403543176693
62-62	213-213	4.993403543176693
49-49	225-225	4.993403543176693
996-999	1066-1068	5.842548486400364
100-100	177-177	4.993403543176693
15-18	123-126	5.262712702995698
97-97	183-183	4.993403543176693
15-15	272-272	4.993403543176693
0-8	824-825	15.98688393543129
136-136	148-148	4.993403543176693
0-0	127-130	8.20431702172749
113-113	150-150	4.993403543176693
992-1006	1075-1075	5.391747688389817
62-62	198-198	4.993403543176693
51-51	210-210	4.993403543176693
91-91	175-175	4.993403543176693
8-8	258-258	4.993403543176693
123-123	141-141	4.993403543176693
276-279	1103-1110	6.712169183972818
545-554	816-816	10.228994691535497
4-4	301-301	4.993403543176693
944-955	1098-1099	5.142043365391598
95-95	209-209	4.993403543176693
930-931	1116-1122	5.5303495252027925
13-13	296-296	4.993403543176693
123-123	185-185	4.993403543176693
111-111	200-200	4.993403543176693
83-83	229-229	4.993403543176693
601-617	824-825	27.325540171249884
74-74	243-243	4.993403543176693
27-39	125-125	5.679998600892594
58-112	299-310	95.13654739460408
119-119	170-170	4.993403543176693
407-408	956-975	6.528511778689467
126-126	173-173	4.993403543176693
112-112	189-189	4.993403543176693
86-86	256-256	4.993403543176693
146-146	195-195	4.993403543176693
89-89	251-251	4.993403543176693
0-0	337-337	4.993403543176693
47-49	126-128	6.435156145379109
74-74	276-276	4.993403543176693
982-982	1117-1120	8.20431702172749
66-66	278-278	4.993403543176693
223-223	1180-1182	14.980846470340548
110-110	211-211	4.993403543176693
9-22	48-57	5.8763079500093784
72-72	261-261	4.993403543176693
99-99	231-231	4.993403543176693
4-15	155-155	5.842548486400364
21-21	308-308	4.993403543176693
114-114	259-259	4.993403543176693
48-48	325-325	4.993403543176693
152-152	222-222	4.993403543176693
157-157	211-211	4.993403543176693
106-106	265-265	4.993403543176693
126-126	257-257	4.993403543176693
103-103	280-280	4.993403543176693
132-132	250-250	4.993403543176693
87-87	295-295	4.993403543176693
110-110	243-243	4.993403543176693
14-14	340-340	4.993403543176693
51-51	313-313	4.993403543176693
86-96	980-984	33.636734037345086
0-0	361-361	4.993403543176693
943-972	1021-1022	21.842706202586335
136-136	227-227	4.993403543176693
34-34	376-376	4.993403543176693
193-193	219-219	4.993403543176693
177-177	230-230	4.993403543176693
73-73	331-331	4.993403543176693
120-120	275-275	4.993403543176693
527-531	898-899	10.228994691535497
17-17	376-376	4.993403543176693
144-144	255-255	4.993403543176693
56-56	343-343	4.993403543176693
0-0	399-399	4.993403543176693
260-264	809-810	14.660377007620538
86-91	485-520	42.4811852793311
68-68	319-319	4.993403543176693
59-59	326-326	4.993403543176693
106-106	285-285	4.993403543176693
178-178	212-212	4.993403543176693
73-73	315-315	4.993403543176693
156-156	286-286	4.993403543176693
67-67	376-376	4.993403543176693
213-213	232-232	4.993403543176693
37-38	184-187	6.681956017436231
59-59	373-373	4.993403543176693
114-114	320-320	4.993403543176693
37-37	397-397	4.993403543176693
192-192	243-243	4.993403543176693
709-718	1117-1126	7.411706315977935
0-0	425-425	4.993403543176693
109-109	315-315	4.993403543176693
44-44	380-380	4.993403543176693
80-80	349-349	4.993403543176693
1026-1026	1090-1098	6.435156145379109
1034-1044	1082-1082	6.02036325131709
932-944	1184-1184	5.679998600892594
10-10	410-410	4.993403543176693
57-57	422-422	4.993403543176693
132-132	344-344	4.993403543176693
79-79	397-397	4.993403543176693
1013-1020	1148-1149	5.262712702995698
89-89	146-147	9.98701901811067
163-163	303-303	4.993403543176693
157-157	310-310	4.993403543176693
17-17	210-223	5.5303495252027925
206-206	261-261	4.993403543176693
111-111	356-356	4.993403543176693
188-188	276-276	4.993403543176693
10-10	455-455	4.993403543176693
194-194	269-269	4.993403543176693
38-38	424-424	4.993403543176693
66-66	395-395	4.993403543176693
22-22	437-437	4.993403543176693
78-78	380-380	4.993403543176693
47-47	411-411	4.993403543176693
28-60	106-106	6.528511778689467
105-111	120-120	6.965120950169018
103-103	353-353	4.993403543176693
87-87	367-367	4.993403543176693
35-35	419-419	4.993403543176693
86-90	378-410	12.967254905915661
148-148	304-304	4.993403543176693
211-211	238-238	4.993403543176693
17-17	432-432	4.993403543176693
39-39	470-470	4.993403543176693
1007-1008	1143-1145	7.297073465893105
356-369	1070-1072	5.829950184889894
232-232	272-272	4.993403543176693
946-946	1199-1207	6.435156145379109
214-214	293-293	4.993403543176693
195-195	307-307	4.993403543176693
189-189	313-313	4.993403543176693
92-92	410-410	4.993403543176693
119-119	377-377	4.993403543176693
148-148	350-350	4.993403543176693
127-127	371-371	4.993403543176693
219-219	280-280	4.993403543176693
14-14	481-481	4.993403543176693
62-62	432-432	4.993403543176693
166-166	319-319	4.993403543176693
994-995	1157-1162	6.216524564480528
69-69	415-415	4.993403543176693
8-8	476-476	4.993403543176693
199-199	287-287	4.993403543176693
110-110	371-371	4.993403543176693
22-22	460-460	4.993403543176693
194-194	356-356	4.993403543176693
890-891	1168-1179	10.812314846154827
223-223	325-325	4.993403543176693
235-235	314-314	4.993403543176693
128-131	143-145	5.842548486400364
170-170	377-377	4.993403543176693
180-180	364-364	4.993403543176693
725-749	891-892	5.335196315982686
115-115	430-430	4.993403543176693
38-38	507-507	4.993403543176693
106-106	453-453	4.993403543176693
187-187	369-369	4.993403543176693
3-6	274-274	8.20431702172749
229-229	328-328	4.993403543176693
73-73	202-204	8.892936751799443
251-251	301-301	4.993403543176693
487-489	890-948	12.392672999134424
79-80	197-197	9.98701901811067
124-124	429-429	4.993403543176693
123-123	440-440	4.993403543176693
159-159	403-403	4.993403543176693
137-137	423-423	4.993403543176693
129-129	446-446	4.993403543176693
173-173	399-399	4.993403543176693
147-147	421-421	4.993403543176693
185-185	332-332	4.993403543176693
142-142	376-376	4.993403543176693
98-98	421-421	4.993403543176693
38-38	489-489	4.993403543176693
256-256	264-264	4.993403543176693
609-609	1027-1034	10.980960599695397
215-215	307-307	4.993403543176693
48-48	474-474	4.993403543176693
5-5	517-517	4.993403543176693
169-169	366-366	4.993403543176693
57-67	202-202	6.02036325131709
124-127	1123-1149	19.25945041137446
44-44	486-486	4.993403543176693
16-16	514-514	4.993403543176693
17-17	523-523	4.993403543176693
58-60	209-209	8.892936751799443
478-498	1148-1148	7.879384703205568
2-2	534-534	4.993403543176693
133-133	406-406	4.993403543176693
206-206	404-404	4.993403543176693
8-8	600-600	4.993403543176693
79-79	530-530	4.993403543176693
88-88	526-526	4.993403543176693
86-86	528-528	4.993403543176693
50-50	564-564	4.993403543176693
153-153	459-459	4.993403543176693
67-67	552-552	4.993403543176693
90-90	216-220	7.698016274247212
213-213	409-409	4.993403543176693
232-232	388-388	4.993403543176693
10-22	85-89	12.076430889978546
186-186	439-439	4.993403543176693
26-26	598-598	4.993403543176693
275-275	354-354	4.993403543176693
432-459	1197-1202	5.443157819081371
123-132	264-320	38.48803850065082
304-304	329-329	4.993403543176693
1-14	1021-1022	25.12429291215772
987-992	1021-1026	26.752809970294724
153-153	485-485	4.993403543176693
233-233	404-404	4.993403543176693
110-110	526-526	4.993403543176693
106-106	479-479	4.993403543176693
223-223	363-363	4.993403543176693
1023-1030	1069-1071	18.258276397122064
9-9	581-581	4.993403543176693
241-241	350-350	4.993403543176693
2-2	591-591	4.993403543176693
344-363	1021-1022	15.000627669886406
50-50	545-545	4.993403543176693
91-95	204-204	7.698016274247212
117-117	477-477	4.993403543176693
66-66	226-239	5.5303495252027925
35-87	136-136	5.171912785253425
784-787	871-872	10.980960599695397
92-92	511-511	4.993403543176693
711-761	1070-1070	26.925398797312617
0-0	602-602	4.993403543176693
287-287	318-318	4.993403543176693
261-261	343-343	4.993403543176693
130-130	474-474	4.993403543176693
23-23	581-581	4.993403543176693
52-52	554-554	4.993403543176693
67-67	616-616	4.993403543176693
26-26	656-656	4.993403543176693
101-101	579-579	4.993403543176693
310-310	369-369	4.993403543176693
2-2	677-677	4.993403543176693
79-79	598-598	4.993403543176693
51-51	626-626	4.993403543176693
277-277	399-399	4.993403543176693
86-86	586-586	4.993403543176693
486-519	1168-1168	6.4411821951048855
106-106	597-597	4.993403543176693
186-186	515-515	4.993403543176693
797-798	859-878	5.96998359881161
287-287	407-407	4.993403543176693
154-154	538-538	4.993403543176693
133-133	211-215	7.698016274247212
103-103	239-247	6.435156145379109
87-89	257-260	5.842548486400364
136-136	557-557	4.993403543176693
39-39	654-654	4.993403543176693
86-89	887-939	31.876756160323353
126-126	564-564	4.993403543176693
288-288	365-365	4.993403543176693
128-128	524-524	4.993403543176693
10-14	315-316	6.435156145379109
485-491	708-725	10.502285272417739
121-121	528-528	4.993403543176693
9-9	639-639	4.993403543176693
250-250	391-391	4.993403543176693
89-89	552-552	4.993403543176693
257-257	383-383	4.993403543176693
283-283	377-377	4.993403543176693
251-251	409-409	4.993403543176693
260-260	402-402	4.993403543176693
107-107	555-555	4.993403543176693
224-224	439-439	4.993403543176693
168-168	489-489	4.993403543176693
200-200	459-459	4.993403543176693
136-141	235-235	7.297073465893105
320-320	426-426	4.993403543176693
52-52	694-694	4.993403543176693
303-303	442-442	4.993403543176693
260-260	478-478	4.993403543176693
140-140	597-597	4.993403543176693
152-152	590-590	4.993403543176693
55-55	687-687	4.993403543176693
44-44	722-722	4.993403543176693
79-79	685-685	4.993403543176693
51-51	714-714	4.993403543176693
222-222	532-532	4.993403543176693
92-92	662-662	4.993403543176693
86-86	672-672	4.993403543176693
321-321	435-435	4.993403543176693
211-211	545-545	4.993403543176693
4-4	753-753	4.993403543176693
219-219	496-496	4.993403543176693
132-132	583-583	4.993403543176693
275-275	439-439	4.993403543176693
78-78	636-636	4.993403543176693
331-331	388-388	4.993403543176693
252-252	466-466	4.993403543176693
23-23	682-682	4.993403543176693
238-238	467-467	4.993403543176693
153-153	551-551	4.993403543176693
37-37	667-667	4.993403543176693
304-304	403-403	4.993403543176693
309-309	397-397	4.993403543176693
103-103	603-603	4.993403543176693
60-60	646-646	4.993403543176693
28-28	681-681	4.993403543176693
1-1	710-710	4.993403543176693
114-114	614-614	4.993403543176693
272-272	458-458	4.993403543176693
173-173	560-560	4.993403543176693
57-57	676-676	4.993403543176693
14-14	721-721	4.993403543176693
240-240	481-481	4.993403543176693
58-58	664-664	4.993403543176693
58-86	1204-1204	10.03503779839428
301-304	970-971	15.74812803813179
326-326	399-399	4.993403543176693
261-261	464-464	4.993403543176693
255-255	470-470	4.993403543176693
29-29	696-696	4.993403543176693
355-355	371-371	4.993403543176693
101-101	720-720	4.993403543176693
308-308	512-512	4.993403543176693
144-144	676-676	4.993403543176693
223-223	600-600	4.993403543176693
1121-1127	1180-1180	6.965120950169018
22-22	797-797	4.993403543176693
375-375	443-443	4.993403543176693
134-134	274-276	8.892936751799443
72-72	746-746	4.993403543176693
78-78	751-751	4.993403543176693
181-181	650-650	4.993403543176693
299-299	528-528	4.993403543176693
323-323	503-503	4.993403543176693
728-729	810-817	8.719030102257172
223-223	581-581	4.993403543176693
388-388	419-419	4.993403543176693
140-140	667-667	4.993403543176693
391-391	409-409	4.993403543176693
168-168	633-633	4.993403543176693
88-88	312-313	9.98701901811067
125-125	678-678	4.993403543176693
121-121	691-691	4.993403543176693
32-54	229-230	5.697065181705861
82-82	733-733	4.993403543176693
49-49	766-766	4.993403543176693
301-301	508-508	4.993403543176693
196-196	613-613	4.993403543176693
126-126	683-683	4.993403543176693
31-31	760-760	4.993403543176693
132-132	658-658	4.993403543176693
192-192	597-597	4.993403543176693
383-383	401-401	4.993403543176693
211-211	573-573	4.993403543176693
49-49	750-750	4.993403543176693
41-41	753-753	4.993403543176693
292-292	501-501	4.993403543176693
273-273	520-520	4.993403543176693
128-128	664-664	4.993403543176693
7-7	785-785	4.993403543176693
27-27	748-748	4.993403543176693
147-147	625-625	4.993403543176693
230-230	543-543	4.993403543176693
163-163	608-608	4.993403543176693
372-426	824-824	16.114569026752974
62-62	707-707	4.993403543176693
127-127	655-655	4.993403543176693
78-78	704-704	4.993403543176693
102-102	681-681	4.993403543176693
173-174	214-220	5.5303495252027925
262-262	519-519	4.993403543176693
195-195	586-586	4.993403543176693
251-251	528-528	4.993403543176693
188-188	591-591	4.993403543176693
105-105	674-674	4.993403543176693
130-130	646-646	4.993403543176693
310-310	467-467	4.993403543176693
301-301	476-476	4.993403543176693
219-219	663-663	4.993403543176693
120-120	762-762	4.993403543176693
302-302	582-582	4.993403543176693
210-210	674-674	4.993403543176693
171-171	713-713	4.993403543176693
95-95	791-791	4.993403543176693
297-297	592-592	4.993403543176693
616-617	765-818	9.181574753269665
118-118	773-773	4.993403543176693
1131-1138	1206-1207	5.262712702995698
48-59	613-619	13.180411053995588
274-274	620-620	4.993403543176693
127-127	767-767	4.993403543176693
39-39	827-827	4.993403543176693
307-307	560-560	4.993403543176693
132-132	736-736	4.993403543176693
509-513	1052-1055	8.35269863546654
378-378	491-491	4.993403543176693
359-359	510-510	4.993403543176693
138-138	732-732	4.993403543176693
91-91	779-779	4.993403543176693
47-106	1021-1024	149.7849528180049
286-286	586-586	4.993403543176693
173-173	701-701	4.993403543176693
76-76	798-798	4.993403543176693
126-126	751-751	4.993403543176693
187-187	691-691	4.993403543176693
43-43	835-835	4.993403543176693
135-136	302-306	6.216524564480528
13-13	866-866	4.993403543176693
376-376	474-474	4.993403543176693
211-211	639-639	4.993403543176693
25-25	824-824	4.993403543176693
343-343	512-512	4.993403543176693
367-367	487-487	4.993403543176693
105-105	749-749	4.993403543176693
805-815	890-892	12.750095923694074
241-241	617-617	4.993403543176693
246-246	611-611	4.993403543176693
79-79	783-783	4.993403543176693
266-266	594-594	4.993403543176693
338-338	522-522	4.993403543176693
310-310	550-550	4.993403543176693
103-103	757-757	4.993403543176693
35-35	799-799	4.993403543176693
487-489	1082-1090	7.121633235045313
135-135	700-700	4.993403543176693
104-104	728-728	4.993403543176693
281-281	557-557	4.993403543176693
334-334	505-505	4.993403543176693
309-309	530-530	4.993403543176693
125-125	711-711	4.993403543176693
120-120	716-716	4.993403543176693
385-385	452-452	4.993403543176693
140-140	697-697	4.993403543176693
320-320	523-523	4.993403543176693
88-88	753-753	4.993403543176693
111-111	736-736	4.993403543176693
225-225	620-620	4.993403543176693
52-52	793-793	4.993403543176693
511-513	1070-1071	12.000398902706877
7-10	468-471	5.262712702995698
353-353	603-603	4.993403543176693
340-340	616-616	4.993403543176693
304-304	652-652	4.993403543176693
459-459	499-499	4.993403543176693
86-87	231-236	9.633026045741577
463-463	489-489	4.993403543176693
192-192	760-760	4.993403543176693
27-27	925-925	4.993403543176693
396-396	557-557	4.993403543176693
267-267	687-687	4.993403543176693
175-175	780-780	4.993403543176693
376-376	573-573	4.993403543176693
277-277	674-674	4.993403543176693
97-97	854-854	4.993403543176693
112-112	832-832	4.993403543176693
266-266	679-679	4.993403543176693
106-108	363-368	5.028751530925774
1-1	944-944	4.993403543176693
318-318	628-628	4.993403543176693
406-406	541-541	4.993403543176693
387-387	554-554	4.993403543176693
229-229	712-712	4.993403543176693
165-165	775-775	4.993403543176693
305-305	638-638	4.993403543176693
210-210	732-732	4.993403543176693
123-123	813-813	4.993403543176693
301-304	373-383	17.716315772833855
439-439	499-499	4.993403543176693
144-144	788-788	4.993403543176693
51-54	258-261	8.719030102257172
56-60	528-542	16.807753839411774
8-8	295-309	8.921593776218243
89-89	841-841	4.993403543176693
0-4	460-462	5.391747688389817
235-235	691-691	4.993403543176693
92-92	835-835	4.993403543176693
305-305	619-619	4.993403543176693
271-271	654-654	4.993403543176693
124-124	801-801	4.993403543176693
290-290	630-630	4.993403543176693
218-218	702-702	4.993403543176693
346-346	575-575	4.993403543176693
296-296	625-625	4.993403543176693
362-362	556-556	4.993403543176693
139-139	779-779	4.993403543176693
34-34	884-884	4.993403543176693
392-392	525-525	4.993403543176693
22-22	892-892	4.993403543176693
86-87	371-371	9.98701901811067
377-377	535-535	4.993403543176693
237-237	675-675	4.993403543176693
223-223	689-689	4.993403543176693
75-75	838-838	4.993403543176693
15-15	898-898	4.993403543176693
47-47	864-864	4.993403543176693
423-423	487-487	4.993403543176693
403-403	506-506	4.993403543176693
308-308	601-601	4.993403543176693
1021-1022	1045-1098	85.02844289433621
426-426	480-480	4.993403543176693
72-72	833-833	4.993403543176693
79-84	1115-1117	12.024709709799183
261-308	1070-1072	41.87028452919959
198-198	704-704	4.993403543176693
14-14	888-888	4.993403543176693
223-223	676-676	4.993403543176693
94-94	805-805	4.993403543176693
428-428	588-588	4.993403543176693
207-207	810-810	4.993403543176693
122-122	896-896	4.993403543176693
186-186	833-833	4.993403543176693
346-346	674-674	4.993403543176693
150-150	870-870	4.993403543176693
59-59	961-961	4.993403543176693
314-314	707-707	4.993403543176693
424-424	597-597	4.993403543176693
287-287	734-734	4.993403543176693
159-159	864-864	4.993403543176693
16-16	993-993	4.993403543176693
105-105	905-905	4.993403543176693
79-79	931-931	4.993403543176693
389-389	623-623	4.993403543176693
376-435	1021-1022	52.247773650128984
294-294	719-719	4.993403543176693
475-475	539-539	4.993403543176693
188-188	826-826	4.993403543176693
124-124	890-890	4.993403543176693
51-51	963-963	4.993403543176693
26-26	988-988	4.993403543176693
99-103	406-407	6.216524564480528
35-35	980-980	4.993403543176693
101-101	902-902	4.993403543176693
185-185	820-820	4.993403543176693
458-458	548-548	4.993403543176693
222-222	784-784	4.993403543176693
288-288	704-704	4.993403543176693
142-142	853-853	4.993403543176693
377-377	617-617	4.993403543176693
197-197	800-800	4.993403543176693
23-28	467-469	5.028751530925774
324-324	663-663	4.993403543176693
375-375	609-609	4.993403543176693
11-11	973-973	4.993403543176693
95-96	396-398	7.297073465893105
370-409	818-818	8.746910923154251
136-136	852-852	4.993403543176693
370-370	619-619	4.993403543176693
61-61	928-928	4.993403543176693
39-39	939-939	4.993403543176693
1021-1022	1150-1209	70.2203184199671
214-214	765-765	4.993403543176693
62-64	425-425	8.892936751799443
43-59	275-277	5.27958466243585
148-148	835-835	4.993403543176693
429-429	551-551	4.993403543176693
366-366	614-614	4.993403543176693
90-90	890-890	4.993403543176693
255-255	713-713	4.993403543176693
127-127	841-841	4.993403543176693
140-140	834-834	4.993403543176693
103-103	871-871	4.993403543176693
3-3	478-489	5.842548486400364
134-134	839-839	4.993403543176693
125-125	848-848	4.993403543176693
17-17	946-946	4.993403543176693
123-125	355-359	5.391747688389817
193-193	769-769	4.993403543176693
157-157	805-805	4.993403543176693
440-440	521-521	4.993403543176693
72-74	405-409	5.391747688389817
204-204	762-762	4.993403543176693
372-372	593-593	4.993403543176693
100-100	864-864	4.993403543176693
484-489	582-617	10.798063892378464
306-306	795-795	4.993403543176693
43-43	1059-1059	4.993403543176693
292-292	811-811	4.993403543176693
192-192	904-904	4.993403543176693
0-0	1097-1097	4.993403543176693
502-502	596-596	4.993403543176693
23-23	1069-1069	4.993403543176693
467-467	625-625	4.993403543176693
286-286	806-806	4.993403543176693
45-45	1048-1048	4.993403543176693
362-362	731-731	4.993403543176693
527-529	830-861	5.453609389817996
209-209	885-885	4.993403543176693
98-98	996-996	4.993403543176693
1-1	545-548	8.20431702172749
57-57	1033-1033	4.993403543176693
506-506	611-611	4.993403543176693
59-60	496-501	5.842548486400364
216-222	340-341	5.5303495252027925
41-41	1077-1077	4.993403543176693
274-274	844-844	4.993403543176693
255-255	863-863	4.993403543176693
350-350	762-762	4.993403543176693
278-278	837-837	4.993403543176693
287-287	827-827	4.993403543176693
132-132	982-982	4.993403543176693
54-54	499-501	8.892936751799443
525-525	586-586	4.993403543176693
483-483	627-627	4.993403543176693
244-244	866-866	4.993403543176693
188-188	917-917	4.993403543176693
58-58	1046-1046	4.993403543176693
898-901	1046-1064	8.82711087099214
212-212	892-892	4.993403543176693
325-325	810-810	4.993403543176693
431-431	701-701	4.993403543176693
67-67	1063-1063	4.993403543176693
130-130	435-436	9.98701901811067
237-237	894-894	4.993403543176693
26-28	535-539	5.391747688389817
478-478	651-651	4.993403543176693
0-0	1129-1129	4.993403543176693
81-81	1048-1048	4.993403543176693
395-395	734-734	4.993403543176693
513-513	609-609	4.993403543176693
250-250	872-872	4.993403543176693
411-411	712-712	4.993403543176693
216-216	905-905	4.993403543176693
150-150	971-971	4.993403543176693
548-548	602-602	4.993403543176693
195-196	375-383	5.028751530925774
446-446	703-703	4.993403543176693
132-132	1017-1017	4.993403543176693
101-103	471-473	6.435156145379109
530-530	618-618	4.993403543176693
244-244	904-904	4.993403543176693
471-471	676-676	4.993403543176693
496-496	649-649	4.993403543176693
28-28	1117-1117	4.993403543176693
316-316	828-828	4.993403543176693
102-102	1040-1040	4.993403543176693
552-552	590-590	4.993403543176693
278-278	864-864	4.993403543176693
216-216	926-926	4.993403543176693
140-140	1000-1000	4.993403543176693
88-88	1050-1050	4.993403543176693
260-260	878-878	4.993403543176693
476-476	661-661	4.993403543176693
92-92	1044-1044	4.993403543176693
311-311	825-825	4.993403543176693
166-166	970-970	4.993403543176693
479-479	553-553	4.993403543176693
169-169	863-863	4.993403543176693
241-241	792-792	4.993403543176693
348-348	686-686	4.993403543176693
344-344	690-690	4.993403543176693
251-251	783-783	4.993403543176693
125-126	390-395	5.842548486400364
423-423	614-614	4.993403543176693
266-266	773-773	4.993403543176693
71-71	968-968	4.993403543176693
408-408	616-616	4.993403543176693
223-223	801-801	4.993403543176693
80-80	944-944	4.993403543176693
127-132	383-383	7.297073465893105
96-96	929-929	4.993403543176693
235-235	278-279	9.98701901811067
375-375	652-652	4.993403543176693
365-365	662-662	4.993403543176693
28-28	999-999	4.993403543176693
52-52	460-464	7.698016274247212
136-140	377-377	7.698016274247212
48-48	982-982	4.993403543176693
236-236	813-813	4.993403543176693
38-38	1013-1013	4.993403543176693
7-7	1046-1046	4.993403543176693
526-526	527-527	4.993403543176693
134-134	921-921	4.993403543176693
3-3	1051-1051	4.993403543176693
0-1	520-520	9.98701901811067
302-302	738-738	4.993403543176693
126-126	914-914	4.993403543176693
104-109	415-415	7.297073465893105
467-467	576-576	4.993403543176693
11-11	1033-1033	4.993403543176693
229-229	815-815	4.993403543176693
141-141	903-903	4.993403543176693
32-32	499-501	8.892936751799443
471-471	594-594	4.993403543176693
302-302	763-763	4.993403543176693
62-62	1008-1008	4.993403543176693
0-0	1068-1068	4.993403543176693
440-440	619-619	4.993403543176693
352-352	707-707	4.993403543176693
485-491	1021-1024	38.16248144116225
264-264	798-798	4.993403543176693
69-69	994-994	4.993403543176693
120-120	943-943	4.993403543176693
60-60	1000-1000	4.993403543176693
175-175	908-908	4.993403543176693
507-507	574-574	4.993403543176693
255-255	826-826	4.993403543176693
242-242	838-838	4.993403543176693
389-389	698-698	4.993403543176693
120-120	967-967	4.993403543176693
530-530	556-556	4.993403543176693
471-471	614-614	4.993403543176693
212-212	873-873	4.993403543176693
142-142	943-943	4.993403543176693
141-141	944-944	4.993403543176693
135-135	950-950	4.993403543176693
73-77	466-468	5.391747688389817
102-103	432-438	5.5303495252027925
269-269	806-806	4.993403543176693
378-378	696-696	4.993403543176693
344-344	728-728	4.993403543176693
295-295	777-777	4.993403543176693
112-112	960-960	4.993403543176693
53-53	1026-1026	4.993403543176693
223-223	855-855	4.993403543176693
808-833	1142-1143	10.46363017535845
494-494	583-583	4.993403543176693
123-133	479-489	35.56553378573648
260-260	816-816	4.993403543176693
307-307	914-914	4.993403543176693
406-406	814-814	4.993403543176693
209-209	1013-1013	4.993403543176693
513-513	704-704	4.993403543176693
248-248	971-971	4.993403543176693
14-14	593-608	5.262712702995698
442-442	787-787	4.993403543176693
69-81	539-539	5.679998600892594
260-260	968-968	4.993403543176693
88-88	1143-1143	4.993403543176693
215-224	396-396	6.216524564480528
60-60	1166-1166	4.993403543176693
465-465	771-771	4.993403543176693
75-75	1164-1164	4.993403543176693
33-33	1199-1199	4.993403543176693
38-38	1194-1194	4.993403543176693
93-93	1139-1139	4.993403543176693
541-541	691-691	4.993403543176693
130-130	1103-1103	4.993403543176693
522-522	712-712	4.993403543176693
210-210	1025-1025	4.993403543176693
88-88	1156-1156	4.993403543176693
550-550	694-694	4.993403543176693
224-224	1018-1018	4.993403543176693
93-93	1150-1150	4.993403543176693
117-117	1126-1126	4.993403543176693
128-128	1115-1115	4.993403543176693
528-528	715-715	4.993403543176693
304-304	939-939	4.993403543176693
390-390	865-865	4.993403543176693
185-240	299-305	23.63436478480279
62-62	1186-1186	4.993403543176693
410-410	838-838	4.993403543176693
614-614	649-649	4.993403543176693
540-540	723-723	4.993403543176693
431-431	832-832	4.993403543176693
577-577	685-685	4.993403543176693
360-360	902-902	4.993403543176693
231-232	398-399	8.20431702172749
140-140	1118-1118	4.993403543176693
438-438	820-820	4.993403543176693
280-280	978-978	4.993403543176693
170-170	1087-1087	4.993403543176693
395-395	862-862	4.993403543176693
56-82	484-489	15.389790125723765
126-140	502-502	5.391747688389817
310-310	960-960	4.993403543176693
304-304	967-967	4.993403543176693
177-177	1091-1091	4.993403543176693
277-277	991-991	4.993403543176693
106-106	1163-1163	4.993403543176693
135-135	1131-1131	4.993403543176693
298-301	333-334	6.681956017436231
452-452	814-814	4.993403543176693
73-73	1191-1191	4.993403543176693
374-374	890-890	4.993403543176693
245-245	1020-1020	4.993403543176693
106-111	812-826	10.200779852655014
830-838	1025-1028	6.274640748372507
371-371	905-905	4.993403543176693
169-169	1108-1108	4.993403543176693
204-204	1073-1073	4.993403543176693
126-126	512-513	9.98701901811067
292-292	985-985	4.993403543176693
487-487	785-785	4.993403543176693
120-120	1033-1033	4.993403543176693
127-127	1028-1028	4.993403543176693
375-375	779-779	4.993403543176693
186-186	971-971	4.993403543176693
86-86	1073-1073	4.993403543176693
62-80	219-219	11.793739741031096
303-303	856-856	4.993403543176693
8-8	1150-1150	4.993403543176693
133-133	1025-1025	4.993403543176693
141-141	1020-1020	4.993403543176693
77-77	1083-1083	4.993403543176693
295-295	865-865	4.993403543176693
260-260	903-903	4.993403543176693
257-264	320-321	5.262712702995698
94-94	1071-1071	4.993403543176693
18-18	1146-1146	4.993403543176693
533-533	633-633	4.993403543176693
23-23	1143-1143	4.993403543176693
120-123	461-462	6.681956017436231
424-424	742-742	4.993403543176693
396-396	770-770	4.993403543176693
363-363	805-805	4.993403543176693
123-123	1047-1047	4.993403543176693
467-467	704-704	4.993403543176693
381-381	790-790	4.993403543176693
195-195	977-977	4.993403543176693
557-567	823-824	11.174865311393582
553-553	620-620	4.993403543176693
355-355	819-819	4.993403543176693
375-375	800-800	4.993403543176693
324-324	851-851	4.993403543176693
234-234	941-941	4.993403543176693
73-73	1103-1103	4.993403543176693
106-106	1072-1072	4.993403543176693
352-352	826-826	4.993403543176693
138-138	1043-1043	4.993403543176693
8-8	1174-1174	4.993403543176693
57-57	1126-1126	4.993403543176693
101-101	1085-1085	4.993403543176693
423-442	489-489	19.47991671285419
126-133	465-466	5.262712702995698
520-520	670-670	4.993403543176693
158-158	1031-1031	4.993403543176693
0-0	1188-1188	4.993403543176693
317-317	871-871	4.993403543176693
309-309	879-879	4.993403543176693
290-292	304-307	5.842548486400364
223-223	970-970	4.993403543176693
6-6	1186-1186	4.993403543176693
824-824	887-946	32.26824034270995
58-62	340-340	12.68845291727118
214-214	985-985	4.993403543176693
452-452	746-746	4.993403543176693
69-69	1128-1128	4.993403543176693
651-652	1190-1195	9.633026045741577
1-1	1201-1201	4.993403543176693
230-230	972-972	4.993403543176693
510-510	693-693	4.993403543176693
143-143	1058-1058	4.993403543176693
423-423	778-778	4.993403543176693
93-93	1114-1114	4.993403543176693
304-304	903-903	4.993403543176693
331-331	873-873	4.993403543176693
104-104	1100-1100	4.993403543176693
319-319	892-892	4.993403543176693
276-276	932-932	4.993403543176693
268-293	824-824	13.993777681612487
328-328	881-881	4.993403543176693
74-74	1141-1141	4.993403543176693
195-195	1020-1020	4.993403543176693
502-502	713-713	4.993403543176693
417-417	795-795	4.993403543176693
150-150	1063-1063	4.993403543176693
479-479	896-896	4.993403543176693
435-435	940-940	4.993403543176693
404-404	971-971	4.993403543176693
60-62	625-627	6.435156145379109
309-312	376-376	8.20431702172749
474-474	895-895	4.993403543176693
275-275	1093-1093	4.993403543176693
490-490	877-877	4.993403543176693
485-485	882-882	4.993403543176693
240-240	1126-1126	4.993403543176693
543-543	823-823	4.993403543176693
513-513	853-853	4.993403543176693
225-225	1139-1139	4.993403543176693
374-374	990-990	4.993403543176693
177-177	1186-1186	4.993403543176693
339-339	1024-1024	4.993403543176693
599-599	764-764	4.993403543176693
360-360	1003-1003	4.993403543176693
258-258	1102-1102	4.993403543176693
241-241	1117-1117	4.993403543176693
579-579	780-780	4.993403543176693
353-353	1006-1006	4.993403543176693
587-587	769-769	4.993403543176693
471-471	886-886	4.993403543176693
231-255	1070-1070	10.643372735102606
218-231	822-826	9.026262755068561
411-411	943-943	4.993403543176693
553-553	799-799	4.993403543176693
329-329	1021-1021	4.993403543176693
218-218	1130-1130	4.993403543176693
667-681	1070-1070	8.921593776218243
497-497	849-849	4.993403543176693
376-376	970-970	4.993403543176693
238-238	1109-1109	4.993403543176693
453-453	894-894	4.993403543176693
248-248	1096-1096	4.993403543176693
324-324	1021-1021	4.993403543176693
337-337	1008-1008	4.993403543176693
4-5	697-699	7.297073465893105
608-608	1120-1127	10.980960599695397
587-587	817-817	4.993403543176693
367-367	1034-1034	4.993403543176693
303-303	1098-1098	4.993403543176693
257-257	1146-1146	4.993403543176693
526-526	871-871	4.993403543176693
633-633	763-763	4.993403543176693
294-294	1105-1105	4.993403543176693
539-545	1188-1189	9.139659880291635
197-197	1196-1196	4.993403543176693
202-202	1191-1191	4.993403543176693
154-155	543-543	9.98701901811067
676-676	719-719	4.993403543176693
579-579	816-816	4.993403543176693
388-388	1006-1006	4.993403543176693
185-185	1203-1203	4.993403543176693
353-353	1035-1035	4.993403543176693
299-299	1091-1091	4.993403543176693
559-559	831-831	4.993403543176693
146-149	548-548	8.20431702172749
301-301	1083-1083	4.993403543176693
359-359	1026-1026	4.993403543176693
103-105	589-589	8.892936751799443
610-610	776-776	4.993403543176693
483-483	903-903	4.993403543176693
307-307	1080-1080	4.993403543176693
614-614	766-766	4.993403543176693
321-321	1060-1060	4.993403543176693
373-373	1008-1008	4.993403543176693
193-193	1189-1189	4.993403543176693
214-214	1168-1168	4.993403543176693
439-439	943-943	4.993403543176693
286-286	1097-1097	4.993403543176693
368-368	1010-1010	4.993403543176693
231-231	1148-1148	4.993403543176693
408-408	898-898	4.993403543176693
129-129	1177-1177	4.993403543176693
614-614	692-692	4.993403543176693
597-597	708-708	4.993403543176693
471-471	833-833	4.993403543176693
235-235	1076-1076	4.993403543176693
291-291	1020-1020	4.993403543176693
86-92	689-738	30.00456262927023
423-423	885-885	4.993403543176693
225-225	1074-1074	4.993403543176693
233-233	1066-1066	4.993403543176693
301-302	348-348	9.98701901811067
152-152	1146-1146	4.993403543176693
132-132	514-520	6.965120950169018
295-295	1003-1003	4.993403543176693
237-237	1060-1060	4.993403543176693
443-443	854-854	4.993403543176693
146-146	1150-1150	4.993403543176693
103-103	1200-1200	4.993403543176693
586-643	1021-1022	56.53200179166164
476-476	815-815	4.993403543176693
131-131	1157-1157	4.993403543176693
107-107	1182-1182	4.993403543176693
614-614	675-675	4.993403543176693
310-310	979-979	4.993403543176693
173-173	1122-1122	4.993403543176693
458-458	837-837	4.993403543176693
340-340	953-953	4.993403543176693
123-123	1159-1159	4.993403543176693
223-223	1059-1059	4.993403543176693
307-307	975-975	4.993403543176693
183-183	1100-1100	4.993403543176693
154-154	1126-1126	4.993403543176693
71-71	1210-1210	4.993403543176693
546-546	735-735	4.993403543176693
136-136	1150-1150	4.993403543176693
123-123	514-526	5.679998600892594
451-451	835-835	4.993403543176693
170-170	1117-1117	4.993403543176693
177-177	1110-1110	4.993403543176693
555-555	729-729	4.993403543176693
436-436	848-848	4.993403543176693
241-241	1044-1044	4.993403543176693
485-485	854-854	4.993403543176693
295-295	1043-1043	4.993403543176693
277-277	1064-1064	4.993403543176693
182-183	489-489	9.98701901811067
189-191	480-483	5.842548486400364
583-583	760-760	4.993403543176693
253-253	1089-1089	4.993403543176693
62-65	606-609	5.262712702995698
513-513	829-829	4.993403543176693
124-124	1204-1204	4.993403543176693
208-208	1120-1120	4.993403543176693
204-204	1127-1127	4.993403543176693
275-275	1056-1056	4.993403543176693
614-614	718-718	4.993403543176693
170-170	1164-1164	4.993403543176693
544-544	776-776	4.993403543176693
399-399	921-921	4.993403543176693
450-450	871-871	4.993403543176693
186-186	1137-1137	4.993403543176693
150-150	1174-1174	4.993403543176693
619-619	705-705	4.993403543176693
192-192	1133-1133	4.993403543176693
260-260	1066-1066	4.993403543176693
462-466	821-826	9.897341912791973
524-524	803-803	4.993403543176693
494-494	833-833	4.993403543176693
153-153	1159-1159	4.993403543176693
423-423	890-890	4.993403543176693
592-592	722-722	4.993403543176693
375-375	939-939	4.993403543176693
220-223	1112-1120	9.164544482571362
589-589	905-905	4.993403543176693
713-713	779-779	4.993403543176693
307-307	1186-1186	4.993403543176693
476-476	1017-1017	4.993403543176693
344-344	1147-1147	4.993403543176693
137-138	608-608	9.98701901811067
9-11	733-735	6.435156145379109
681-681	807-807	4.993403543176693
315-315	1188-1188	4.993403543176693
479-479	1022-1022	4.993403543176693
610-610	891-891	4.993403543176693
722-722	776-776	4.993403543176693
615-615	883-883	4.993403543176693
513-513	964-964	4.993403543176693
71-72	664-669	5.842548486400364
272-272	1202-1202	4.993403543176693
542-542	931-931	4.993403543176693
464-464	1023-1023	4.993403543176693
689-689	798-798	4.993403543176693
597-597	890-890	4.993403543176693
415-415	1070-1070	4.993403543176693
439-439	1046-1046	4.993403543176693
641-641	843-843	4.993403543176693
214-224	275-276	7.737846339709354
491-491	991-991	4.993403543176693
124-126	241-251	9.5126557102508
315-315	1165-1165	4.993403543176693
325-325	1199-1199	4.993403543176693
692-692	832-832	4.993403543176693
497-497	1028-1028	4.993403543176693
3-11	209-212	19.19291759101996
431-431	1091-1091	4.993403543176693
411-411	1112-1112	4.993403543176693
489-489	1034-1034	4.993403543176693
89-89	669-676	6.681956017436231
486-486	1047-1047	4.993403543176693
555-555	979-979	4.993403543176693
614-614	921-921	4.993403543176693
322-322	1206-1206	4.993403543176693
301-305	451-462	15.50062064042612
404-404	1125-1125	4.993403543176693
347-347	1183-1183	4.993403543176693
665-665	865-865	4.993403543176693
351-351	1158-1158	4.993403543176693
439-439	1069-1069	4.993403543176693
611-618	1162-1163	8.719030102257172
637-637	871-871	4.993403543176693
516-516	992-992	4.993403543176693
697-697	813-813	4.993403543176693
608-608	902-902	4.993403543176693
689-689	816-816	4.993403543176693
710-710	797-797	4.993403543176693
452-452	1064-1064	4.993403543176693
274-275	481-489	5.028751530925774
401-401	1117-1117	4.993403543176693
58-58	697-705	6.435156145379109
779-780	989-1013	5.335196315982686
359-359	1154-1154	4.993403543176693
487-487	1026-1026	4.993403543176693
336-336	1179-1179	4.993403543176693
368-368	1146-1146	4.993403543176693
136-141	618-619	5.842548486400364
591-591	835-835	4.993403543176693
310-310	1117-1117	4.993403543176693
403-403	1024-1024	4.993403543176693
95-95	610-627	5.028751530925774
608-608	819-819	4.993403543176693
373-373	1052-1052	4.993403543176693
620-620	805-805	4.993403543176693
253-253	1177-1177	4.993403543176693
399-399	1032-1032	4.993403543176693
128-135	1188-1192	8.746910923154251
440-440	991-991	4.993403543176693
424-424	1007-1007	4.993403543176693
567-567	861-861	4.993403543176693
537-537	891-891	4.993403543176693
500-500	928-928	4.993403543176693
462-462	966-966	4.993403543176693
601-601	828-828	4.993403543176693
377-377	1057-1057	4.993403543176693
495-495	939-939	4.993403543176693
569-569	869-869	4.993403543176693
597-597	842-842	4.993403543176693
244-244	1192-1192	4.993403543176693
464-464	946-946	4.993403543176693
292-292	1117-1117	4.993403543176693
581-581	833-833	4.993403543176693
278-278	1134-1134	4.993403543176693
389-389	1023-1023	4.993403543176693
393-393	1026-1026	4.993403543176693
548-548	871-871	4.993403543176693
429-429	990-990	4.993403543176693
225-225	1193-1193	4.993403543176693
463-463	955-955	4.993403543176693
255-255	1162-1162	4.993403543176693
123-125	582-587	5.028751530925774
485-485	932-932	4.993403543176693
408-408	1009-1009	4.993403543176693
693-701	1070-1070	10.58058343580523
627-627	789-789	4.993403543176693
299-299	1124-1124	4.993403543176693
490-490	933-933	4.993403543176693
192-203	513-513	5.842548486400364
439-439	982-982	4.993403543176693
592-592	866-866	4.993403543176693
481-481	977-977	4.993403543176693
291-291	1168-1168	4.993403543176693
869-873	1167-1198	15.5053869008653
610-610	850-850	4.993403543176693
701-701	761-761	4.993403543176693
267-267	1196-1196	4.993403543176693
432-432	1032-1032	4.993403543176693
409-409	1057-1057	4.993403543176693
579-579	887-887	4.993403543176693
1070-1070	1153-1209	36.68141193458284
710-751	1024-1024	5.829950184889894
672-672	797-797	4.993403543176693
621-621	848-848	4.993403543176693
525-525	944-944	4.993403543176693
568-568	902-902	4.993403543176693
564-564	907-907	4.993403543176693
315-315	1126-1126	4.993403543176693
391-391	1050-1050	4.993403543176693
333-333	1110-1110	4.993403543176693
512-512	931-931	4.993403543176693
505-505	938-938	4.993403543176693
445-445	997-997	4.993403543176693
477-477	967-967	4.993403543176693
475-475	969-969	4.993403543176693
704-704	743-743	4.993403543176693
591-591	855-855	4.993403543176693
123-129	989-1020	10.512843422233157
429-429	1024-1024	4.993403543176693
664-664	789-789	4.993403543176693
581-581	874-874	4.993403543176693
322-322	1132-1132	4.993403543176693
39-50	86-89	31.328141442077243
189-199	533-533	6.02036325131709
507-507	1140-1140	4.993403543176693
275-276	545-548	6.681956017436231
650-650	995-995	4.993403543176693
489-489	1145-1145	4.993403543176693
372-376	1111-1125	6.3965477054596525
763-763	871-871	4.993403543176693
469-469	1166-1166	4.993403543176693
665-665	970-970	4.993403543176693
463-463	1169-1169	4.993403543176693
505-505	1127-1127	4.993403543176693
747-747	885-885	4.993403543176693
219-219	596-599	8.20431702172749
104-118	708-708	5.391747688389817
531-531	1105-1105	4.993403543176693
569-569	1067-1067	4.993403543176693
640-640	1019-1019	4.993403543176693
554-554	1104-1104	4.993403543176693
548-548	1109-1109	4.993403543176693
590-590	1073-1073	4.993403543176693
757-757	905-905	4.993403543176693
614-614	1046-1046	4.993403543176693
793-793	867-867	4.993403543176693
726-726	934-934	4.993403543176693
577-577	1072-1072	4.993403543176693
62-62	768-814	17.238657517836753
478-478	1177-1177	4.993403543176693
763-763	890-890	4.993403543176693
608-608	1044-1044	4.993403543176693
524-524	1084-1084	4.993403543176693
827-828	1174-1176	12.000398902706877
399-399	1210-1210	4.993403543176693
126-127	409-412	10.980960599695397
486-486	1127-1127	4.993403543176693
587-587	1026-1026	4.993403543176693
489-489	1111-1111	4.993403543176693
425-425	1176-1176	4.993403543176693
34-36	764-767	5.842548486400364
594-594	1007-1007	4.993403543176693
766-766	836-836	4.993403543176693
823-825	1023-1030	14.419207110496583
672-672	932-932	4.993403543176693
14-14	376-401	10.4817286658629
275-276	528-528	9.98701901811067
517-517	1107-1107	4.993403543176693
750-750	877-877	4.993403543176693
582-582	1044-1044	4.993403543176693
636-636	990-990	4.993403543176693
548-548	1081-1081	4.993403543176693
581-581	1049-1049	4.993403543176693
492-492	1124-1124	4.993403543176693
703-703	913-913	4.993403543176693
510-510	1111-1111	4.993403543176693
325-326	486-486	9.98701901811067
798-798	824-824	4.993403543176693
525-525	1057-1057	4.993403543176693
52-52	733-743	6.02036325131709
377-377	1202-1202	4.993403543176693
609-609	970-970	4.993403543176693
401-401	1175-1175	4.993403543176693
398-398	1179-1179	4.993403543176693
712-712	862-862	4.993403543176693
527-527	1045-1045	4.993403543176693
639-639	931-931	4.993403543176693
683-683	888-888	4.993403543176693
452-452	1117-1117	4.993403543176693
522-522	1047-1047	4.993403543176693
303-305	480-481	7.297073465893105
580-580	989-989	4.993403543176693
690-690	907-907	4.993403543176693
631-631	966-966	4.993403543176693
471-471	1125-1125	4.993403543176693
528-528	1067-1067	4.993403543176693
371-375	423-425	5.5303495252027925
781-781	812-812	4.993403543176693
301-302	871-885	13.243274631045038
406-406	1185-1185	4.993403543176693
82-86	168-194	7.968955242444277
100-119	1070-1070	15.405119609075797
545-545	1044-1044	4.993403543176693
62-62	728-737	6.216524564480528
563-563	1021-1021	4.993403543176693
372-372	1176-1176	4.993403543176693
760-760	789-789	4.993403543176693
733-733	816-816	4.993403543176693
399-399	1151-1151	4.993403543176693
339-347	432-432	6.435156145379109
425-425	1120-1120	4.993403543176693
110-111	269-283	9.897341912791973
672-672	874-874	4.993403543176693
564-564	983-983	4.993403543176693
363-363	1178-1178	4.993403543176693
553-553	988-988	4.993403543176693
472-472	1071-1071	4.993403543176693
655-655	888-888	4.993403543176693
468-468	1069-1069	4.993403543176693
525-525	1039-1039	4.993403543176693
57-62	462-462	12.000398902706877
681-681	883-883	4.993403543176693
761-761	806-806	4.993403543176693
730-730	836-836	4.993403543176693
690-690	871-871	4.993403543176693
682-682	879-879	4.993403543176693
490-490	1073-1073	4.993403543176693
496-496	1066-1066	4.993403543176693
431-431	1126-1126	4.993403543176693
701-701	852-852	4.993403543176693
169-225	1066-1072	45.93080625574481
470-470	1084-1084	4.993403543176693
608-608	946-946	4.993403543176693
584-584	970-970	4.993403543176693
682-682	1078-1078	4.993403543176693
212-215	666-667	6.681956017436231
581-581	1185-1185	4.993403543176693
681-681	1084-1084	4.993403543176693
103-103	772-787	5.262712702995698
8-8	873-875	8.892936751799443
832-832	932-932	4.993403543176693
620-620	1150-1150	4.993403543176693
567-567	1202-1202	4.993403543176693
770-770	998-998	4.993403543176693
70-74	515-524	5.509739291143601
842-842	933-933	4.993403543176693
713-713	1061-1061	4.993403543176693
125-127	761-761	8.892936751799443
594-594	1179-1179	4.993403543176693
630-630	1143-1143	4.993403543176693
688-688	1085-1085	4.993403543176693
706-706	1066-1066	4.993403543176693
485-489	794-833	20.177832028717116
806-806	972-972	4.993403543176693
814-814	968-968	4.993403543176693
787-787	995-995	4.993403543176693
623-623	1160-1160	4.993403543176693
400-404	489-490	6.216524564480528
597-597	1183-1183	4.993403543176693
888-931	1021-1024	43.949738521539246
762-762	1023-1023	4.993403543176693
872-872	913-913	4.993403543176693
685-685	1105-1105	4.993403543176693
829-829	961-961	4.993403543176693
811-811	980-980	4.993403543176693
260-260	630-638	6.435156145379109
614-614	1175-1175	4.993403543176693
79-110	374-377	47.62934204138892
784-784	944-944	4.993403543176693
670-670	1061-1061	4.993403543176693
792-792	939-939	4.993403543176693
603-603	1127-1127	4.993403543176693
102-103	170-209	10.87160397345092
622-622	1110-1110	4.993403543176693
396-403	466-467	5.262712702995698
753-753	979-979	4.993403543176693
821-821	914-914	4.993403543176693
701-701	1033-1033	4.993403543176693
372-372	496-497	9.98701901811067
646-646	1093-1093	4.993403543176693
666-666	1072-1072	4.993403543176693
415-423	451-452	5.028751530925774
825-825	916-916	4.993403543176693
124-129	745-745	7.297073465893105
553-553	1193-1193	4.993403543176693
435-471	1070-1070	26.480197694514025
732-732	1014-1014	4.993403543176693
303-305	567-572	5.028751530925774
691-691	1058-1058	4.993403543176693
777-777	973-973	4.993403543176693
720-720	1032-1032	4.993403543176693
679-679	1075-1075	4.993403543176693
70-70	806-809	8.20431702172749
854-854	904-904	4.993403543176693
816-816	943-943	4.993403543176693
709-709	992-992	4.993403543176693
535-535	1164-1164	4.993403543176693
507-507	1203-1203	4.993403543176693
627-627	1082-1082	4.993403543176693
604-604	1104-1104	4.993403543176693
590-590	1118-1118	4.993403543176693
533-533	1174-1174	4.993403543176693
648-648	1059-1059	4.993403543176693
526-526	1179-1179	4.993403543176693
528-528	1190-1190	4.993403543176693
649-649	1069-1069	4.993403543176693
57-62	1141-1148	10.858420038529642
295-297	563-564	7.297073465893105
58-61	798-799	6.681956017436231
123-125	733-735	6.435156145379109
806-806	906-906	4.993403543176693
170-173	691-692	6.681956017436231
532-532	1195-1195	4.993403543176693
257-273	597-597	5.142043365391598
696-696	1026-1026	4.993403543176693
51-53	809-809	8.892936751799443
51-52	372-389	9.164544482571362
761-761	962-962	4.993403543176693
540-540	1180-1180	4.993403543176693
594-594	1126-1126	4.993403543176693
704-704	1017-1017	4.993403543176693
639-639	1030-1030	4.993403543176693
562-562	1106-1106	4.993403543176693
608-608	1058-1058	4.993403543176693
811-811	855-855	4.993403543176693
668-668	1009-1009	4.993403543176693
612-612	1067-1067	4.993403543176693
731-731	944-944	4.993403543176693
622-622	1062-1062	4.993403543176693
714-714	970-970	4.993403543176693
709-709	975-975	4.993403543176693
610-610	1075-1075	4.993403543176693
888-891	1125-1131	7.013359009015101
476-476	1205-1205	4.993403543176693
222-223	618-618	9.98701901811067
504-504	1179-1179	4.993403543176693
779-779	914-914	4.993403543176693
376-378	467-467	8.892936751799443
817-817	871-871	4.993403543176693
501-501	1188-1188	4.993403543176693
166-170	676-677	6.216524564480528
814-836	1075-1076	5.570676999591531
1021-1022	1111-1149	46.62955421769368
725-725	1192-1192	4.993403543176693
772-772	1147-1147	4.993403543176693
893-893	1026-1026	4.993403543176693
862-862	1043-1043	4.993403543176693
792-792	1112-1112	4.993403543176693
92-94	536-548	6.195121708783231
720-720	1189-1189	4.993403543176693
860-860	1049-1049	4.993403543176693
354-361	597-597	6.681956017436231
891-891	1017-1017	4.993403543176693
732-732	1179-1179	4.993403543176693
819-819	1091-1091	4.993403543176693
864-864	1033-1033	4.993403543176693
468-473	478-479	6.216524564480528
816-816	1084-1084	4.993403543176693
440-441	510-511	8.20431702172749
727-727	1161-1161	4.993403543176693
797-797	1093-1093	4.993403543176693
780-780	1111-1111	4.993403543176693
757-757	1136-1136	4.993403543176693
55-57	891-891	8.892936751799443
763-805	1021-1022	41.2562986433606
890-890	991-991	4.993403543176693
816-816	1064-1064	4.993403543176693
142-144	478-491	5.829950184889894
905-905	982-982	4.993403543176693
883-883	1004-1004	4.993403543176693
692-692	1193-1193	4.993403543176693
826-826	1049-1049	4.993403543176693
855-855	1020-1020	4.993403543176693
893-893	981-981	4.993403543176693
759-759	1120-1120	4.993403543176693
754-754	1124-1124	4.993403543176693
232-232	705-708	8.20431702172749
791-791	1085-1085	4.993403543176693
824-824	1083-1090	10.980960599695397
735-735	1129-1129	4.993403543176693
705-705	1160-1160	4.993403543176693
79-84	850-852	5.028751530925774
775-775	1083-1083	4.993403543176693
860-860	996-996	4.993403543176693
873-873	989-989	4.993403543176693
377-388	548-548	5.842548486400364
846-846	1015-1015	4.993403543176693
890-890	962-962	4.993403543176693
844-844	1005-1005	4.993403543176693
873-873	977-977	4.993403543176693
816-816	1024-1024	4.993403543176693
87-88	834-834	9.98701901811067
644-644	1194-1194	4.993403543176693
27-30	890-891	6.681956017436231
294-307	1057-1066	9.829695442689902
770-770	1063-1063	4.993403543176693
627-627	1207-1207	4.993403543176693
229-243	375-377	5.633096203223135
885-885	944-944	4.993403543176693
643-643	1181-1181	4.993403543176693
830-830	994-994	4.993403543176693
800-800	1027-1027	4.993403543176693
836-836	991-991	4.993403543176693
634-634	1188-1188	4.993403543176693
760-760	1062-1062	4.993403543176693
617-617	1203-1203	4.993403543176693
328-329	581-581	9.98701901811067
869-870	1017-1029	7.234360031236446
299-304	801-828	38.911138448810696
790-790	1026-1026	4.993403543176693
622-622	1189-1189	4.993403543176693
727-727	1083-1083	4.993403543176693
748-748	1060-1060	4.993403543176693
831-831	977-977	4.993403543176693
62-64	839-841	6.435156145379109
687-687	1120-1120	4.993403543176693
27-27	870-883	5.5303495252027925
613-613	1191-1191	4.993403543176693
416-417	486-486	9.98701901811067
631-631	1171-1171	4.993403543176693
608-608	1195-1195	4.993403543176693
859-859	942-942	4.993403543176693
852-852	949-949	4.993403543176693
594-594	1204-1204	4.993403543176693
681-681	1117-1117	4.993403543176693
717-717	1081-1081	4.993403543176693
865-865	933-933	4.993403543176693
788-788	1011-1011	4.993403543176693
799-799	997-997	4.993403543176693
801-801	1073-1106	6.4411821951048855
652-652	1141-1141	4.993403543176693
773-773	1020-1020	4.993403543176693
485-491	1177-1197	11.662713329360345
110-110	899-913	5.391747688389817
990-990	1046-1046	4.993403543176693
857-857	1180-1180	4.993403543176693
880-880	1158-1158	4.993403543176693
995-995	1044-1044	4.993403543176693
411-411	608-609	9.98701901811067
482-487	1118-1120	20.204452697563664
970-970	1071-1071	4.993403543176693
95-104	921-921	6.216524564480528
900-900	1145-1145	4.993403543176693
851-851	1195-1195	4.993403543176693
991-991	1056-1056	4.993403543176693
873-873	1143-1143	4.993403543176693
195-250	1021-1023	107.33854222408614
651-677	1021-1022	19.467454562295256
42-43	966-970	6.435156145379109
810-810	1210-1210	4.993403543176693
837-837	1183-1183	4.993403543176693
991-991	1029-1029	4.993403543176693
824-824	1199-1199	4.993403543176693
968-968	1057-1057	4.993403543176693
985-985	1040-1040	4.993403543176693
122-132	600-637	31.32314181558663
142-142	871-872	9.98701901811067
375-377	638-639	7.297073465893105
582-587	878-879	13.81378307895271
8-8	989-997	6.435156145379109
166-168	834-835	7.297073465893105
893-893	1111-1111	4.993403543176693
978-978	1026-1026	4.993403543176693
327-329	677-677	8.892936751799443
980-980	1034-1034	4.993403543176693
126-132	375-375	16.43584273513124
986-986	1029-1029	4.993403543176693
202-202	799-809	6.02036325131709
489-490	513-520	5.262712702995698
813-813	1200-1200	4.993403543176693
955-955	1032-1032	4.993403543176693
814-814	1170-1170	4.993403543176693
851-851	1140-1140	4.993403543176693
865-865	1126-1126	4.993403543176693
458-470	1139-1148	8.25457077654718
0-1	995-1003	5.028751530925774
873-873	1124-1124	4.993403543176693
810-810	1162-1162	4.993403543176693
824-824	1148-1148	4.993403543176693
76-83	577-579	7.474677913266228
875-875	1100-1100	4.993403543176693
0-9	1070-1072	28.600253693797992
878-878	1091-1091	4.993403543176693
155-158	827-830	5.262712702995698
869-869	1102-1102	4.993403543176693
129-131	356-368	8.846879227543148
972-972	1008-1008	4.993403543176693
964-964	1017-1017	4.993403543176693
978-978	1004-1004	4.993403543176693
798-798	1180-1180	4.993403543176693
873-873	1084-1084	4.993403543176693
832-832	1126-1126	4.993403543176693
891-891	1067-1067	4.993403543176693
798-800	1125-1128	9.633026045741577
805-805	1159-1159	4.993403543176693
783-783	1179-1179	4.993403543176693
904-904	1058-1058	4.993403543176693
831-831	1111-1111	4.993403543176693
784-784	1159-1159	4.993403543176693
885-885	1058-1058	4.993403543176693
540-541	901-914	10.178051578919613
37-52	440-441	9.636466292203234
881-881	1066-1066	4.993403543176693
931-931	1013-1013	4.993403543176693
867-867	1060-1060	4.993403543176693
838-838	1085-1085	4.993403543176693
932-932	991-991	4.993403543176693
134-136	825-827	6.435156145379109
878-878	1056-1056	4.993403543176693
887-887	1045-1045	4.993403543176693
951-951	980-980	4.993403543176693
823-823	1107-1107	4.993403543176693
848-848	1080-1080	4.993403543176693
1067-1067	1127-1127	4.993403543176693
1023-1023	1175-1175	4.993403543176693
1045-1045	1154-1154	4.993403543176693
1010-1010	1175-1175	4.993403543176693
1059-1059	1125-1125	4.993403543176693
103-103	989-991	8.892936751799443
981-981	1207-1207	4.993403543176693
991-991	1197-1197	4.993403543176693
1006-1006	1171-1171	4.993403543176693
1064-1064	1117-1117	4.993403543176693
195-233	608-609	16.496631373987736
1055-1056	1134-1141	8.719030102257172
499-501	616-618	6.435156145379109
38-38	1074-1084	6.02036325131709
0-1	1117-1117	9.98701901811067
1063-1063	1169-1169	4.993403543176693
307-308	809-814	5.842548486400364
275-318	1021-1024	66.2471217693052
353-357	763-763	7.698016274247212
84-88	1025-1027	5.391747688389817
466-467	647-650	6.681956017436231
1045-1045	1183-1183	4.993403543176693
491-491	620-627	6.681956017436231
126-133	775-828	25.993728748337976
109-110	1000-1000	9.98701901811067
989-1014	1182-1182	7.234360031236446
1052-1052	1164-1164	4.993403543176693
1060-1060	1148-1148	4.993403543176693
1072-1072	1143-1143	4.993403543176693
74-80	1030-1030	6.965120950169018
88-90	1045-1045	8.892936751799443
241-241	891-893	8.892936751799443
1070-1070	1128-1149	7.737846339709354
1045-1045	1210-1210	4.993403543176693
53-63	222-224	23.657692175240808
486-487	636-640	6.216524564480528
1056-1056	1188-1188	4.993403543176693
1111-1111	1190-1190	4.993403543176693
301-302	887-945	35.97575534531073
1146-1146	1150-1150	4.993403543176693
6-6	1139-1143	7.698016274247212
344-348	801-801	7.698016274247212
163-179	975-975	5.142043365391598
110-110	1028-1039	5.842548486400364
1119-1119	1167-1167	4.993403543176693
69-74	1071-1071	7.297073465893105
1122-1122	1161-1161	4.993403543176693
1089-1089	1188-1188	4.993403543176693
57-110	123-134	83.1367121235231
220-223	915-918	5.262712702995698
875-875	1189-1189	4.993403543176693
884-884	1180-1180	4.993403543176693
8-8	1024-1028	7.698016274247212
860-860	1210-1210	4.993403543176693
375-401	901-902	10.27861058260825
103-103	925-942	5.028751530925774
62-62	261-296	15.655779205994472
964-964	1110-1110	4.993403543176693
1013-1013	1061-1061	4.993403543176693
932-932	1146-1146	4.993403543176693
843-843	1205-1205	4.993403543176693
968-968	1083-1083	4.993403543176693
894-894	1159-1159	4.993403543176693
939-939	1115-1115	4.993403543176693
1003-1003	1055-1055	4.993403543176693
859-859	1201-1201	4.993403543176693
307-307	716-733	5.028751530925774
933-933	1166-1166	4.993403543176693
1033-1033	1066-1066	4.993403543176693
875-885	1021-1022	27.362283021536335
1023-1023	1075-1075	4.993403543176693
26-30	1020-1022	5.391747688389817
892-892	1210-1210	4.993403543176693
988-988	1114-1114	4.993403543176693
951-951	1150-1150	4.993403543176693
165-166	885-885	9.98701901811067
921-921	1186-1186	4.993403543176693
1013-1013	1093-1093	4.993403543176693
285-301	760-760	5.142043365391598
61-64	988-991	5.262712702995698
25-25	1028-1033	7.297073465893105
935-935	1175-1175	4.993403543176693
82-86	970-972	5.391747688389817
1068-1073	1117-1123	25.234152541177426
970-970	1112-1112	4.993403543176693
109-111	931-932	7.297073465893105
780-787	818-824	7.441995164661044
883-883	1198-1198	4.993403543176693
939-939	1142-1142	4.993403543176693
1023-1025	1114-1120	7.879384703205568
890-890	1195-1195	4.993403543176693
1023-1023	1062-1062	4.993403543176693
930-930	1161-1161	4.993403543176693
885-885	1204-1204	4.993403543176693
921-921	1168-1168	4.993403543176693
210-224	830-830	5.391747688389817
966-966	1129-1129	4.993403543176693
944-944	1148-1148	4.993403543176693
157-163	904-904	6.965120950169018
1033-1033	1097-1097	4.993403543176693
943-943	1194-1194	4.993403543176693
513-521	552-553	5.028751530925774
1004-1004	1112-1112	4.993403543176693
919-919	1198-1198	4.993403543176693
927-927	1190-1190	4.993403543176693
186-191	867-868	5.842548486400364
1011-1011	1103-1103	4.993403543176693
0-10	1057-1057	6.02036325131709
49-52	1010-1010	8.20431702172749
981-981	1141-1141	4.993403543176693
277-302	418-419	5.697065181705861
109-109	970-978	6.435156145379109
276-276	801-809	6.435156145379109
982-982	1179-1179	4.993403543176693
62-65	1017-1017	8.20431702172749
90-92	988-991	5.842548486400364
476-480	606-608	5.391747688389817
1056-1056	1113-1113	4.993403543176693
962-962	1186-1186	4.993403543176693
1037-1037	1111-1111	4.993403543176693
102-102	965-980	5.262712702995698
965-965	1194-1194	4.993403543176693
1028-1028	1128-1128	4.993403543176693
971-971	1181-1181	4.993403543176693
754-762	824-824	15.165772620952929
147-154	1070-1070	6.681956017436231
125-127	1092-1097	5.028751530925774
38-53	301-305	13.511543030182244
425-428	797-797	8.20431702172749
58-62	1162-1162	7.698016274247212
86-86	1133-1139	6.965120950169018
223-236	988-988	5.5303495252027925
401-404	827-828	6.681956017436231
349-350	873-876	6.681956017436231
107-107	1114-1124	6.02036325131709
305-305	931-933	8.892936751799443
7-9	485-490	15.98688393543129
40-49	1188-1188	6.216524564480528
98-100	1132-1137	5.028751530925774
202-208	614-620	5.392056925693883
359-359	887-890	8.20431702172749
276-276	972-984	5.679998600892594
442-443	809-813	6.216524564480528
190-193	1061-1062	6.681956017436231
91-91	1159-1160	9.98701901811067
329-359	489-489	6.712169183972818
470-473	790-793	5.5303495252027925
519-520	737-741	6.216524564480528
4-7	830-834	8.028468504032952
449-453	806-806	7.698016274247212
212-212	1050-1055	7.297073465893105
770-772	804-826	6.655704571712604
255-256	1021-1025	6.216524564480528
301-303	543-550	7.474677913266228
219-219	931-938	6.681956017436231
304-308	847-848	6.216524564480528
14-14	1136-1141	7.297073465893105
542-543	611-614	6.681956017436231
1130-1130	1185-1185	4.993403543176693
1122-1122	1191-1191	4.993403543176693
1147-1147	1166-1166	4.993403543176693
188-195	965-965	6.681956017436231
489-491	667-670	5.842548486400364
275-276	890-891	8.20431702172749
484-487	680-681	6.681956017436231
977-980	1072-1079	6.618776429873259
305-305	864-865	9.98701901811067
1-3	1167-1168	7.297073465893105
45-60	1120-1120	5.262712702995698
370-370	801-805	7.698016274247212
1152-1152	1199-1199	4.993403543176693
58-62	725-725	12.68845291727118
126-126	1050-1055	7.297073465893105
491-496	685-686	6.216524564480528
1164-1164	1201-1201	4.993403543176693
810-826	995-1020	11.156801988205558
389-395	793-793	6.965120950169018
66-66	1117-1119	8.892936751799443
52-52	1133-1145	5.679998600892594
373-375	816-816	8.892936751799443
14-14	1179-1182	8.20431702172749
1188-1188	1205-1205	4.993403543176693
393-396	807-810	5.262712702995698
191-198	1006-1007	5.262712702995698
5-8	793-795	9.633026045741577
53-59	1150-1151	5.5303495252027925
103-105	1107-1107	8.892936751799443
30-89	1070-1070	126.05536728000595
304-308	498-502	7.351904335655949
232-238	980-981	5.5303495252027925
28-38	1179-1179	6.02036325131709
484-485	890-891	8.20431702172749
469-471	901-904	5.842548486400364
499-501	865-865	8.892936751799443
185-188	1173-1175	5.842548486400364
11-18	891-891	10.980960599695397
424-424	925-939	6.216524564480528
482-486	873-873	7.698016274247212
528-528	824-825	9.98701901811067
517-519	835-836	7.297073465893105
597-597	751-754	8.20431702172749
520-526	824-825	5.5303495252027925
542-556	795-795	5.391747688389817
95-111	484-494	18.601822394360916
608-610	795-797	6.435156145379109
545-545	858-866	6.435156145379109
85-93	599-653	37.880936876762995
275-276	1128-1128	9.98701901811067
322-324	1073-1075	6.435156145379109
370-370	1021-1025	7.698016274247212
375-377	1019-1020	7.297073465893105
509-513	883-885	5.391747688389817
619-621	767-769	6.435156145379109
498-500	889-892	5.842548486400364
206-206	1182-1189	6.681956017436231
209-211	1174-1179	5.028751530925774
247-247	1135-1137	8.892936751799443
347-352	1027-1027	7.297073465893105
111-112	1194-1197	6.681956017436231
95-99	1209-1210	6.216524564480528
3-9	864-864	11.445874542152529
126-126	1179-1180	9.98701901811067
110-116	539-540	13.120437398775925
500-505	801-803	5.028751530925774
300-302	995-999	5.391747688389817
383-387	913-914	6.216524564480528
159-159	1130-1135	7.297073465893105
86-92	274-287	12.146364154245909
103-104	1185-1186	8.20431702172749
479-480	805-805	9.98701901811067
273-276	1068-1068	8.20431702172749
422-423	464-468	10.228994691535497
376-377	504-518	6.808902771456863
439-439	890-902	5.679998600892594
301-301	1019-1020	9.98701901811067
502-503	821-824	6.681956017436231
275-275	375-403	10.03503779839428
483-491	529-577	12.766229533702937
515-520	798-799	5.842548486400364
145-186	1021-1025	11.020326351668965
201-238	780-780	6.117920158987541
887-933	1069-1072	48.54321070213597
512-514	1179-1191	8.846879227543148
424-425	1072-1072	9.98701901811067
582-583	912-917	5.842548486400364
679-681	799-800	7.297073465893105
583-583	889-891	8.892936751799443
120-138	1021-1024	62.748018397769236
297-303	722-722	11.445874542152529
481-490	1068-1071	64.60096455191979
676-677	830-831	8.20431702172749
484-485	1030-1030	9.98701901811067
52-88	854-885	25.9873772848883
504-505	922-925	6.681956017436231
124-130	180-235	51.457463716580584
448-452	984-985	6.216524564480528
257-258	1176-1180	6.216524564480528
239-240	1195-1199	6.216524564480528
602-607	832-833	5.842548486400364
600-606	806-806	6.965120950169018
530-531	878-885	5.262712702995698
304-307	1110-1113	5.262712702995698
358-359	1061-1063	7.297073465893105
8-8	943-985	5.762657042055204
423-424	1033-1033	9.98701901811067
539-552	1139-1142	7.441995164661044
58-62	913-915	8.921593776218243
294-295	1173-1179	5.5303495252027925
608-616	859-860	5.028751530925774
370-400	1070-1071	39.22963594105728
376-376	1064-1068	7.698016274247212
484-485	962-966	6.216524564480528
394-398	1055-1056	6.216524564480528
38-78	1067-1069	8.469884824986101
578-578	873-876	8.892936751799443
581-582	1066-1066	9.98701901811067
453-455	1188-1193	5.028751530925774
86-88	539-577	24.01601217182688
690-692	940-943	5.842548486400364
123-130	930-985	14.225224458763654
92-96	1010-1011	10.58058343580523
520-520	1139-1145	6.965120950169018
57-59	768-779	9.164544482571362
49-62	1043-1044	7.013359009015101
560-567	1084-1085	5.262712702995698
527-533	1125-1125	6.965120950169018
764-770	841-841	6.965120950169018
636-639	970-972	5.842548486400364
747-752	864-865	5.842548486400364
373-377	431-434	11.793739741031096
298-305	1159-1207	9.248384846477926
27-32	790-842	7.8747318093272325
73-76	723-735	7.725549490889762
448-449	1150-1161	5.5303495252027925
616-616	1009-1010	9.98701901811067
612-614	1013-1016	5.842548486400364
123-126	690-690	19.974885945423775
821-826	1066-1068	12.024709709799183
57-66	588-593	9.76593288778185
601-604	1028-1028	8.20431702172749
676-677	940-940	9.98701901811067
212-217	865-865	12.000398902706877
78-89	996-1016	26.47464111350479
499-501	1070-1075	5.028751530925774
87-89	165-220	64.23508510868967
403-403	1188-1192	7.698016274247212
35-41	1021-1021	11.445874542152529
519-520	1065-1070	5.842548486400364
194-194	863-866	13.599648746512766
468-469	1117-1117	9.98701901811067
440-471	1021-1022	27.933744254051426
528-536	1033-1034	5.028751530925774
687-743	1021-1022	75.49384627780307
300-302	596-628	29.110809142657118
135-136	899-910	7.474677913266228
738-739	823-824	8.20431702172749
708-708	844-859	5.262712702995698
662-663	890-892	7.297073465893105
211-218	961-962	8.719030102257172
771-784	985-985	5.5303495252027925
654-658	1103-1106	5.142043365391598
229-246	943-943	8.35269863546654
603-603	1169-1175	6.965120950169018
583-585	1188-1188	8.892936751799443
292-299	890-890	10.980960599695397
814-824	1182-1193	12.456605758131012
662-662	1116-1132	5.142043365391598
81-92	415-474	32.29316369349146
713-713	1071-1072	9.98701901811067
726-728	1062-1066	5.391747688389817
598-599	1129-1130	8.20431702172749
319-319	824-841	8.35269863546654
968-983	1070-1070	21.033604449154353
14-14	839-878	8.746910923154251
589-603	1149-1149	5.391747688389817
829-839	912-912	6.02036325131709
704-711	1042-1042	6.681956017436231
34-52	1125-1125	8.185918788207058
738-739	1020-1020	9.98701901811067
688-694	1067-1068	5.5303495252027925
496-525	1020-1023	13.169412980473934
122-138	1058-1086	27.667885994857595
106-109	1033-1034	10.980960599695397
518-520	1189-1192	5.842548486400364
273-283	859-860	7.737846339709354
814-815	905-905	9.98701901811067
777-835	1070-1072	56.26627508070453
543-543	1174-1175	9.98701901811067
553-554	1171-1174	6.681956017436231
275-276	583-593	11.174865311393582
122-130	855-885	29.87849082729736
825-841	891-891	5.142043365391598
129-132	702-707	10.812314846154827
220-225	888-891	7.474677913266228
806-806	860-870	6.02036325131709
777-784	891-891	6.681956017436231
125-131	886-907	66.70693812154656
48-60	1071-1098	15.015782461608632
626-626	1047-1059	5.679998600892594
617-617	1056-1066	6.02036325131709
616-616	1181-1188	15.74812803813179
824-824	960-983	10.812314846154827
796-796	896-902	6.965120950169018
262-307	1147-1149	5.938248890658832
243-253	878-878	9.91562541355837
822-824	866-869	5.842548486400364
87-87	1033-1044	9.633026045741577
89-89	1181-1196	8.719030102257172
86-89	326-350	17.228778336126606
123-132	528-559	22.727148288682162
87-90	1071-1126	25.878444561367836
840-842	1062-1065	5.842548486400364
287-315	484-491	46.5458045860407
108-110	633-669	6.895201504275909
81-82	1185-1188	10.980960599695397
198-255	485-493	14.162503548680254
835-835	1059-1060	9.98701901811067
275-305	1026-1033	15.502962753958954
717-732	1148-1148	5.262712702995698
801-813	1069-1069	5.679998600892594
901-901	961-972	5.842548486400364
208-212	1032-1034	8.921593776218243
361-366	878-878	12.000398902706877
161-192	824-825	18.07972520544204
810-812	1040-1042	6.435156145379109
88-90	1148-1148	14.980846470340548
301-304	1117-1127	32.38379685553843
774-775	1070-1070	9.98701901811067
809-868	1021-1022	113.85434658454629
889-890	947-950	6.681956017436231
862-865	969-970	6.681956017436231
728-733	859-865	11.524241970048392
800-800	1007-1010	8.20431702172749
57-63	970-980	25.818796409327362
854-854	1174-1189	5.262712702995698
135-136	872-877	13.81378307895271
56-62	383-394	18.77383605730208
859-877	1114-1117	6.298363758836666
834-835	1189-1193	6.216524564480528
848-848	1175-1181	6.965120950169018
179-221	1150-1150	5.762657042055204
586-644	1068-1072	38.351097392577934
489-491	860-864	8.921593776218243
260-276	301-307	10.871430317267691
301-302	701-704	15.74812803813179
864-868	1148-1149	6.216524564480528
286-307	1045-1046	5.697065181705861
103-103	698-708	18.867531632442365
528-541	1021-1024	25.931348757994627
836-885	1070-1073	17.852287573787667
[truncated: 23 more rows]
